# Supplementary material for: Epicardial YAP/TAZ orchestrate an immunosuppressive response following myocardial infarction
Source: JCI journal article supplement (doi:10.1172/jci88759), 2017-02-05
Supplement: sd1 [file 1]

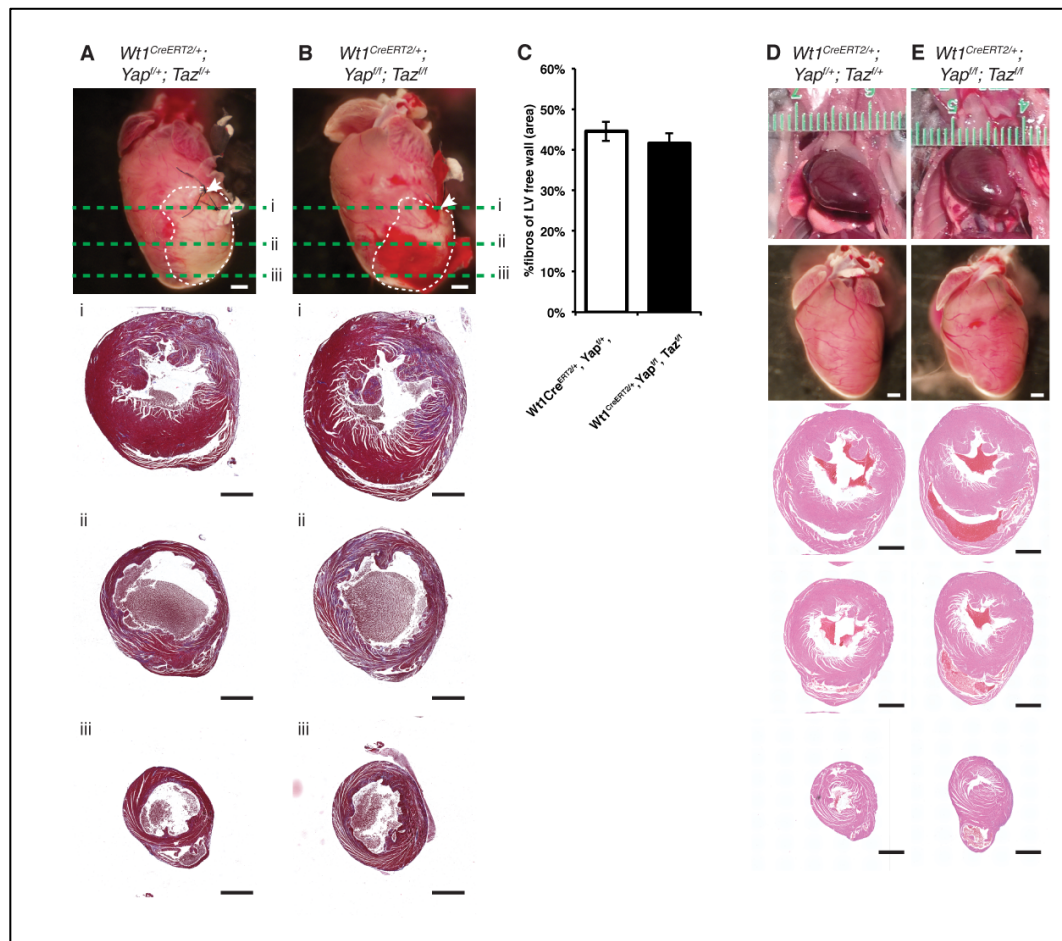

**Supplemental Figure 1. Mutant and control mice demonstrate equal size injury region at 2 days post-LAD ligation.** (A, B) Whole-mount images and histology of control (n=3) and mutant animals (n=4) as indicated, 2 days post-MI (LAD ligation). White dotted line demarcates area of injury near the ligature, and representative Trichrome staining of sections at base (i), mid-ventricle (ii), and apex (iii). (C) Quantification of fibrosis of serial sections; there is no statistical difference between fibrosis in mutant and control (P value was calculated using a two-tailed Student's t-test; Data represent mean  $\pm$  SEM) (D, E) Whole-mount images and histology of control (n=3) and mutant (n=3) 14 days after sham surgery. No excessive fibrosis is noted in the chest wall cavity or heart in the mutant (E). Representative histology images from base, mid-ventricle, and apex are shown in (D, E). (A-E) Tamoxifen administered to both control and mutant 2 days prior to and 2 days post surgery. Scale Bars: 1 mm.

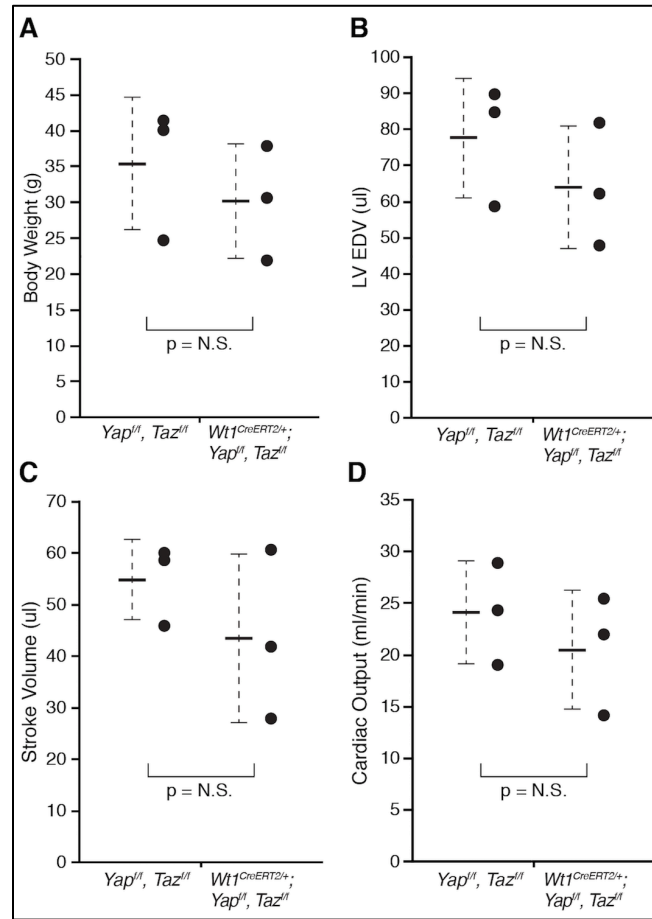

Supplemental Figure 2. Cardiac function in epicardial null mice and control mice are the same at baseline. Transthoracic echocardiography in 3 control (*Taz<sup>fllox/fllox</sup>; Yap<sup>fllox/fllox</sup>*) and 3 mutant mice (*Wt1<sup>CreERT2/+</sup>; Yap<sup>fllox/fllox</sup>; Taz<sup>fllox/fllox</sup>*) after tamoxifen induction and no surgery at 1 week post-MI shows no significance difference in body weight (A), left ventricular end-diastolic volume (LV EDV) (B), stroke volume (C), and cardiac output (D). Data represent mean  $\pm$  SD. P values were calculated using a two-tailed Student's t-test. Significance: N.S. = not significant.

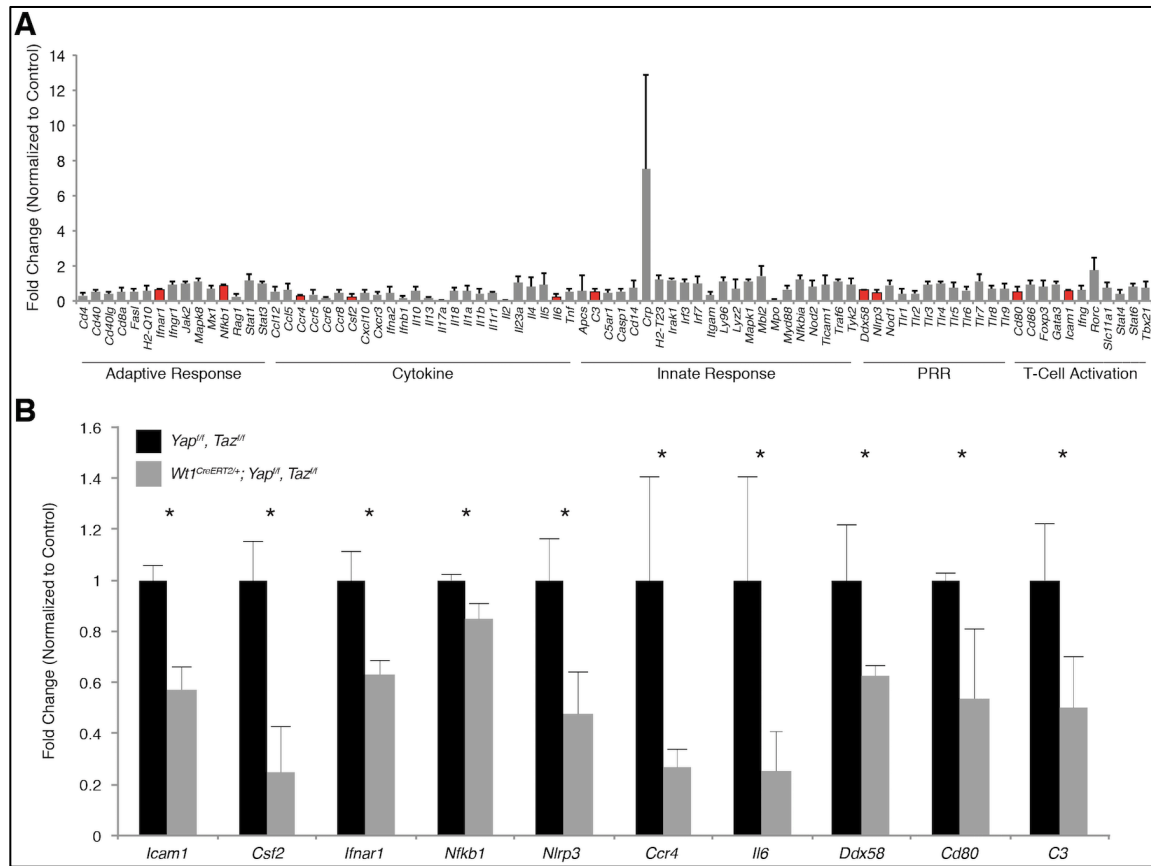

Supplemental Figure 3. Epicardial Yap/Taz null mice demonstrate alteration of multiple immune targets at 14 days post-MI. (A) Bar graph of quantitative RT-PCR immune arrays from microdissected free LV walls of control ( $Yap^{lox/lox}; Taz^{lox/lox}$ , n=3) and mutant ( $Wt1^{CreERT2/+}; Yap^{lox/lox}; Taz^{lox/lox}$ , n=3) animals at 14 days post-MI. Red targets represent significantly downregulated genes in mutants compared with controls (n=3 in both groups). (B) Bar graph showing specific fold changes for the 10 significantly modulated genes in the qRT-PCR immune arrays (n=3 in both groups). Statistics were completed using a Student's t-test. Data represent mean  $\pm$  SD. Significance: \*p < 0.05.

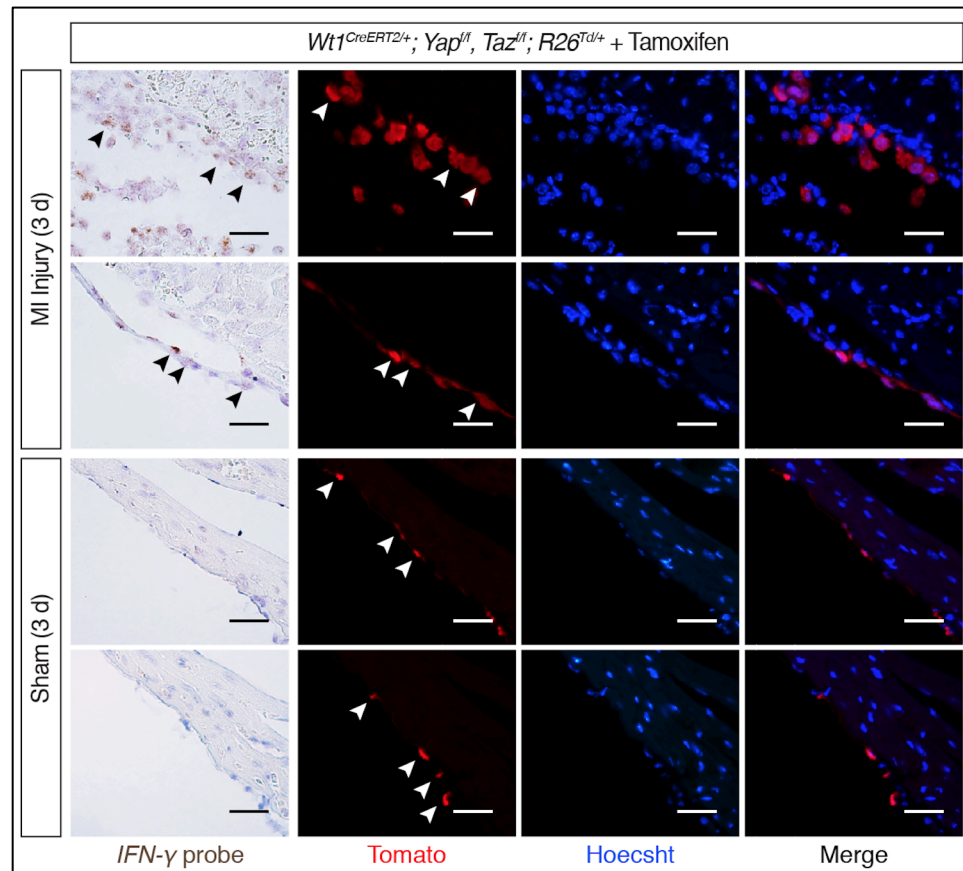

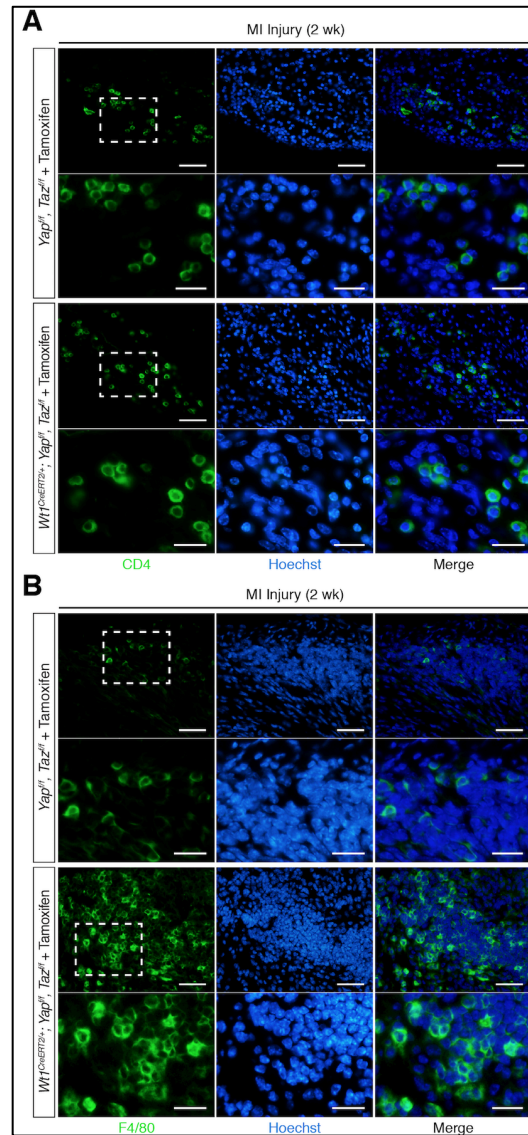

Supplemental Figure 5. Epicardial Yap/Taz null mice exhibit a hyperinflammatory response. (A) Cross sections from *Yap<sup>flox/flox</sup>; Taz<sup>flox/flox</sup>* (control) and *Wt1<sup>CreERT2/+</sup>; Yap<sup>flox/flox</sup>; Taz<sup>flox/flox</sup>* (mutant) animals 14 days post-MI immunostained for CD4 and/or Hoechst demonstrating a similar number of CD4+ T-cells in both groups. (B) Cross sections from *Yap<sup>flox/flox</sup>; Taz<sup>flox/flox</sup>* (control) and *Wt1<sup>CreERT2/+</sup>; Yap<sup>flox/flox</sup>; Taz<sup>flox/flox</sup>* (mutant) animals 14 days post-MI immunostained for F4/80 and/or showing increased F4/80+ macrophages in the mutant mice compared to controls. Scale bars: 50  $\mu$ m (A, B; top panels for each genotype), 25  $\mu$ m (A, B; bottom panels for each genotype).

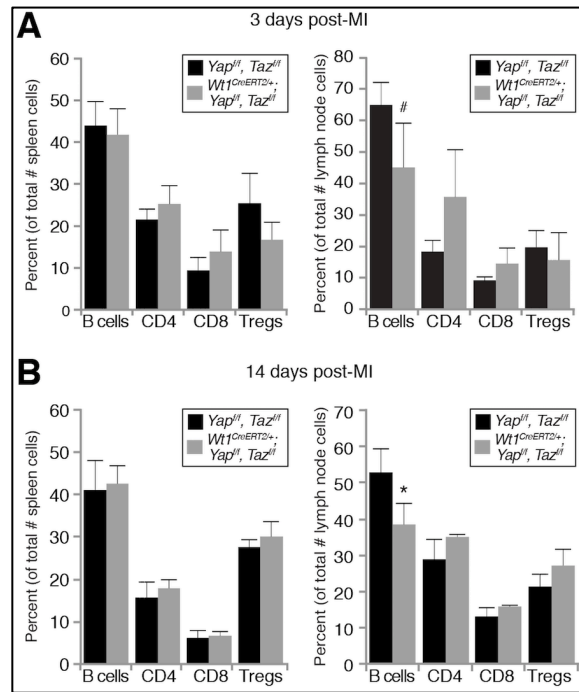

Supplemental Figure 6. Immune cell populations of the spleen and mediastinal lymph node are unchanged following epicardial Yap/Taz deletion. (A-B) Flow cytometry analyses of mediastinal lymph nodes and spleen 3 (A) and 14 (B) days post-MI from mutant ( $Wt1^{CreERT2/+}; Yap^{flox/flox}; Taz^{flox/flox}$ ) and control ( $Yap^{flox/flox}; Taz^{flox/flox}$ ) mice (n=3 in all analyses). Statistics were completed using a Student's t-test, Data represent mean  $\pm$  SD. Significance: #  $p < 0.10$ , and \*  $p < 0.05$ .

**Supplemental Table 1. Quantitative echocardiographic measurements demonstrate significantly reduced LV end-diastolic volume and chamber length in mutant mice after MI.** Comprehensive echocardiographic measurements in  $Taz^{flox/flox}$ ;  $Yap^{flox/flox}$  (control, n=7) and  $Wtl^{CreERT2/+}$ ;  $Yap^{flox/flox}$ ;  $Taz^{flox/flox}$  (mutant, n=6) animals one week post-MI show significantly reduced LV end-diastolic volume, LV diastolic endocardial length and LV systolic endocardial length in epicardial Yap/Taz null mice. Means and standard deviations are shown for each corresponding metric. P values were calculated using a two-tailed Student's t-test.

|                       | LVAEpid | LVAENDd | LVAEN<br>Ds | LVLd  | LVLs  | EDV     | ESV    | SV     | CO     | HR    | LVmass  | LVmass/BW | IVSd  | IVSs  | LVPWd | LVPWs | LVIDd | LVIDs |
|-----------------------|---------|---------|-------------|-------|-------|---------|--------|--------|--------|-------|---------|-----------|-------|-------|-------|-------|-------|-------|
|                       | mm2     | mm2     | mm2         | mm    | mm    | ul      | ul     | ul     | ml/min |       | mg      | mg/g      | mm    | mm    | mm    | mm    | mm    | mm    |
| <b>CONTROLS (N=7)</b> |         |         |             |       |       |         |        |        |        |       |         |           |       |       |       |       |       |       |
| Mean                  | 29.037  | 14.970  | 8.832       | 8.269 | 7.707 | 103.533 | 57.254 | 46.279 | 21.863 | 472   | 126.005 | 4.134     | 0.905 | 1.239 | 0.752 | 1.017 | 4.116 | 3.073 |
| Std deviation         | 4.408   | 1.160   | 1.678       | 0.781 | 0.890 | 15.679  | 15.208 | 3.882  | 2.359  | 25    | 43.850  | 1.084     | 0.229 | 0.302 | 0.149 | 0.195 | 0.302 | 0.386 |
| <b>MUTANTS (N=6)</b>  |         |         |             |       |       |         |        |        |        |       |         |           |       |       |       |       |       |       |
| Mean                  | 25.381  | 13.960  | 8.073       | 7.297 | 6.792 | 85.262  | 46.714 | 38.548 | 15.889 | 409   | 90.074  | 3.849     | 0.829 | 1.156 | 0.748 | 1.057 | 3.972 | 2.874 |
| Std deviation         | 6.569   | 2.797   | 2.910       | 0.554 | 0.694 | 19.930  | 20.576 | 7.710  | 4.787  | 86    | 38.104  | 0.961     | 0.192 | 0.198 | 0.217 | 0.196 | 0.260 | 0.421 |
| <b>P value</b>        | 0.257   | 0.399   | 0.569       | 0.027 | 0.066 | 0.091   | 0.311  | 0.039  | 0.014  | 0.091 | 0.146   | 0.629     | 0.535 | 0.578 | 0.966 | 0.723 | 0.381 | 0.392 |

#### LEGEND

|         |        |                                                                                            |
|---------|--------|--------------------------------------------------------------------------------------------|
| BW      | grams  | Body weight                                                                                |
| HR      | bpm    | Heart rate                                                                                 |
| LVAEpid | mm2    | LV epicardial area at end diastole                                                         |
| LVAENDd | mm2    | LV endocardial area at end diastole                                                        |
| LVAENDs | mm2    | LV endocardial area at end systole                                                         |
| LVLd    | mm     | LV length from plane of the mitral valve to the apical endocardial surface during diastole |
| LVLs    | mm     | LV length from plane of the mitral valve to the apical endocardial surface during systole  |
| EDV     | ul     | End diastolic LV volume                                                                    |
| ESV     | ul     | End systolic LV volume                                                                     |
| SV      | ul     | Stroke volume                                                                              |
| CO      | ml/min | Cardiac output                                                                             |
| HR      |        | Heart rate                                                                                 |
| IVSd    | mm     | Thickness of the Interventricular septum in diastole                                       |
| IVSs    | mm     | Thickness of the Interventricular septum in systole                                        |
| LVPWd   | mm     | LV posterior wall thickness, diastole                                                      |
| LVPWs   | mm     | LV posterior wall thickness, systole                                                       |
| LVDd    | mm     | LV dimension in diastole                                                                   |
| LVDs    | mm     | LV dimension in systole                                                                    |
